# Supplementary material for: The Xanthomonas euvesicatoria type III effector XopAU is an active protein kinase that manipulates plant MAP kinase signaling
Source: PubMed Central journal article supplement (PMC5805367; doi:10.1371/journal.ppat.1006880), 2018-01-29
Supplement: ppat.1006880.s005.pdf [file ppat.1006880.s005.pdf]

Genomic coordinates 1-120. Species: *X. fragariae* isolate Fap21, *X. gardneri* str. JS749-3, *X. euvesicatoria* str. 85-10, *X. perforans* str. 91-118, *X. alfalfae* str. GEV-Rose-07, *X. axonopodis* str. Xac29-1, *X. citri* subsp. *citri* str. jx4, *X. fuscans* subsp. *fuscans* str. 4834-R, *X. vasicola* str. NCPPB 1060, *X. oryzae* pv. *oryzicola* BLS256, *X. campestris* str. NCPPB4346, *X. bromi* isolate LMG947, *Acidovorax avenae* subsp. *avenae* ATCC 19860 ruler.

Genomic coordinates 130-240. Species: *X. fragariae* isolate Fap21, *X. gardneri* str. JS749-3, *X. euvesicatoria* str. 85-10, *X. perforans* str. 91-118, *X. alfalfae* str. GEV-Rose-07, *X. axonopodis* str. Xac29-1, *X. citri* subsp. *citri* str. jx4, *X. fuscans* subsp. *fuscans* str. 4834-R, *X. vasicola* str. NCPPB 1060, *X. oryzae* pv. *oryzicola* BLS256, *X. campestris* str. NCPPB4346, *X. bromi* isolate LMG947, *Acidovorax avenae* subsp. *avenae* ATCC 19860 ruler.

Genomic coordinates 250-360. Species: *X. fragariae* isolate Fap21, *X. gardneri* str. JS749-3, *X. euvesicatoria* str. 85-10, *X. perforans* str. 91-118, *X. alfalfae* str. GEV-Rose-07, *X. axonopodis* str. Xac29-1, *X. citri* subsp. *citri* str. jx4, *X. fuscans* subsp. *fuscans* str. 4834-R, *X. vasicola* str. NCPPB 1060, *X. oryzae* pv. *oryzicola* BLS256, *X. campestris* str. NCPPB4346, *X. bromi* isolate LMG947, *Acidovorax avenae* subsp. *avenae* ATCC 19860 ruler.

Genomic coordinates 370-480. Species: *X. fragariae* isolate Fap21, *X. gardneri* str. JS749-3, *X. euvesicatoria* str. 85-10, *X. perforans* str. 91-118, *X. alfalfae* str. GEV-Rose-07, *X. axonopodis* str. Xac29-1, *X. citri* subsp. *citri* str. jx4, *X. fuscans* subsp. *fuscans* str. 4834-R, *X. vasicola* str. NCPPB 1060, *X. oryzae* pv. *oryzicola* BLS256, *X. campestris* str. NCPPB4346, *X. bromi* isolate LMG947, *Acidovorax avenae* subsp. *avenae* ATCC 19860 ruler.



\* \* \* \* \*  
*X. fragariae* isolate Fap21 AAAGGCATCACCGTCGGCAACTTTATGCTCGCGCAGGCCCGGCGATTGGAGCAAGGGAGGATCACTGCGTCAGACTATCTCGCCGTGGGACGGCAACTGATGGCCGATGTTCTGATCGCT 1065  
*X. gardneri* str. JS749-3 AACGGCATCACCTGTCGGCAACTGATCAAGCGCGCACGCCCGGCAATGCAGCAAGGGATGATCGCTGCGCCAGAGTATCTCGACGTGGCACGGCAACTGATAGCCGATGCTCTGATCGCC 1068  
*X. euvesicatoria* str. 85-10 GACGGCATCAGCGTGGCGAGCATGATTGGCCGCGCACGACAGCGCTGCAGCAAGGGCCCATCAGCGCAATGGAGTATCTCGGCCGGCCCGGAGTATGGCCGACGTAATGGTGGGG 1062  
*X. perforans* str. 91-118 GACGGCATCAGCGTGGCGAGCATGATTGGCCGCGCACGACAGCGCTGCAGCAAGGGCCCATCAGCGCAATGGAGTATCTCGGCCGGCCCGGAGTATGGCCGACGTAATGGTGGGG 1062  
*X. alfae* str. GEV-Rose-07 GACGGCATCAGCGTGGCGAGCATGATTGGCCGCGCACGACAGCGCTGCAGCAAGGGCCCATCAGCGCAATGGAGTATCTCGGCCGGCCCGGAGTATGGCCGACGTAATGGTGGGG 1062  
*X. axonopodis* str. Xac29-1 GACGGCATCAGCGTGGCGAGCATGATTGGCCGCGCACGACAGCGCTGCAGCAAGGGCCCATCAGCGCAATGGAGTATCTCGGCCGGCCCGGAGTATGGCCGACGTAATGGTGGGG 1062  
*X. citri* subsp. *citri* str. jx4 GACGGCATCAGCGTGGCGAGCATGATTGGCCGCGCACGACAGCGCTGCAGCAAGGGCCCATCAGCGCAATGGAGTATCTCGGCCGGCCCGGAGTATGGCCGACGTAATGGTGGGG 1062  
*X. fuscans* subsp. *fuscans* str. 4834-R GACGGCATCAGCGTGGCGAGCATGATTGGCCGCGCACGACAGCGCTGCAGCAAGGGCCCATCAGCGCAATGGAGTATCTCGGCCGGCCCGGAGTATGGCCGACGTAATGGTGGGG 1062  
*X. vasicola* str. NCPPB 1060 GACGGCATCAGCGTGGCGAGCATGATTGGCCGCGCACGACAGCGCTGCAGCAAGGGCCCATCAGCGCAATGGAGTATCTCGGCCGGCCCGGAGTATGGCCGACGTAATGGTGGGG 1062  
*X. oryzae* pv. *oryzicola* BLS256 GACGGCATCAGCGTGGCGAGCATGATTGGCCGCGCACGACAGCGCTGCAGCAAGGGCCCATCAGCGCAATGGAGTATCTCGGCCGGCCCGGAGTATGGCCGACGTAATGGTGGGG 1062  
*X. campestris* str. NCPPB4346 GACGGTATCAGCGTGGCGAGCATGATTGGCCGCGCACGAAAGCGCTGCAGCAAGGGCCCATCAGCGCAATGGAGTATCTCGGCCGGCCCGGAGTATGGCCGACGTAATGGTGGGG 1062  
*X. bromi* isolate LMG947 GACGGCATCAGCGTGGCGAGCATGATTGGCCGCGCACGACAGCGCTGCAGCAAGGATGCCATCAGCGCAATGGAGTATCTCGGCCGGCCCGGAGTATGGCCGACGTAATGGTGGGG 1062  
*Acidovorax avenae* subsp. *avenae* ATCC 19860 GACGGCGTGGCCGGCCGGCAACTGATCGCCGAGGCCTCGATGCCCCGGAAGACGGCGAGCTGCAGCGCCGGCGCATATGGAGAAGGCGCGACCAATGATCGCGGACGTTCTCATCGCC 1059  
ruler .....970.....980.....990.....1000.....1010.....1020.....1030.....1040.....1050.....1060.....1070.....1080

\* \* \* \* \*  
*X. fragariae* isolate Fap21 GTCTCATGCTGTGAAGACATGGGAATCGTGCACCAGGACATTTCCGCAACAACAGTTCATGTACGACGAAACCCGGAAAAATGTTCCGGCTGATCGATATGGGGTAGGTGGAGAGGAGGGA 1185  
*X. gardneri* str. JS749-3 TTATCCTGTTGTGAAGACATGGGAATCGTGCACCAGGACATTTCCGCAACAACAGTTCATGTACGACGAAACCCGGAAAAATGTTCCGGCTGATCGACTTTGGCCGGGTGAAGAAGAAGGT 1188  
*X. euvesicatoria* str. 85-10 ATCGCCTGCTGCGAAGACGCCGGCATCGTGCATCAGGACATCTCGCACAACAACAGTTCATGTACGACCAACCCATGAAGATCTTCCGGCTGATCGACATGGGGTCGGCGCAGAAGAAGGC 1182  
*X. perforans* str. 91-118 ATCGCCTGCTGCGAAGACGCCGGCATCGTGCATCAGGACATCTCGCACAACAACAGTTCATGTACGACCAACCCATGAAGATCTTCCGGCTGATCGACATGGGGTCGGCGCAGAAGAAGGC 1182  
*X. alfae* str. GEV-Rose-07 ATCGCCTGCTGCGAAGACGCCGGCATCGTGCATCAGGACATCTCGCACAACAACAGTTCATGTACGACCAACCCATGAAGATCTTCCGGCTGATCGACATGGGGTCGGCGCAGAAGAAGGC 1182  
*X. axonopodis* str. Xac29-1 ATCGCCTGCTGCGAAGACGCCGGCATCGTGCATCAGGACATCTCGCACAACAACAGTTCATGTACGACCAACCCATGAAGATCTTCCGGCTGATCGACATGGGGTCGGTTAGAGGAAGGC 1182  
*X. citri* subsp. *citri* str. jx4 ATCGCCTGCTGCGAAGACGCCGGCATCGTGCATCAGGACATCTCGCACAACAACAGTTCATGTACGACCAACCCATGAAGATCTTCCGGCTGATCGACATGGGGTCGGTTAGAGGAAGGC 1182  
*X. fuscans* subsp. *fuscans* str. 4834-R ATCGCCTGCTGCGAAGACGCCGGCATCGTGCATCAGGACATCTCGCACAACAACAGTTCATGTACGACCAACCCATGAAGATCTTCCGGCTGATCGACATGGGGTCGGCGCAGAAGAAGGC 1182  
*X. vasicola* str. NCPPB 1060 ATTGCCTGCTGCGAAGACGCCGGCATCGTGCATCAGGACATCTCGCACAACAACAGTTCATGTACGACCAACCCATGAAGATCTTCCGGCTGATCGACATGGGGTCGGTTAGAGGAAGGC 1182  
*X. oryzae* pv. *oryzicola* BLS256 ATTGCCTGCTGCGAAGACGCCGGCATCGTGCATCAGGACATCTCGCACAACAACAGTTCATGTACGACCAACCCATGAAGATCTTCCGGCTGATCGACATGGGGTCGGCGCAGAAGAAGGC 1182  
*X. campestris* str. NCPPB4346 ATTGCCTGCTGCGAAGACGCCGGCATCGTGCATCAGGACATCTCGCACAACAACAGTTCATGTACGACCAACCCATGAAGATCTTCCGGCTGATCGACATGGGGTCGGCGCAGAAGAAGGC 1182  
*X. bromi* isolate LMG947 ATCGCCTGTTGCGAAGACGCCGGCATCGTGCATCAGGACATCTCGCACAACAACAGTTCATGTACGACCAACCCATGAAGATCTTCCGGCTTATCGACATGGGGTCGGTTAGAGGAAGGC 1182  
*Acidovorax avenae* subsp. *avenae* ATCC 19860 CTCGCGCGGTTCCACGACGAAGCGTGGTCCACCAGGACATCTCCACAACAACAGTTCATGTACGACCGGCGAGCGCGGCATGTTCCGGTTGCTGGACATGGGGCAGGGCGAGAGCCGGGC 1179  
ruler .....1090.....1100.....1110.....1120.....1130.....1140.....1150.....1160.....1170.....1180.....1190.....1200

\* \* \* \* \*  
*X. fragariae* isolate Fap21 GAGCCCCCTCGTGCCGGCAGCCAGGATATATCGATATGTCCTC-----ACCAGCGAGCC-----ATGCGCGGGATGCTACAGCGTGGCCAGCTCCTCGTGTATTTTTGAAA 1290  
*X. gardneri* str. JS749-3 GAGCCCCGTAAGGTATGGCACGCCGGCTTTATTCGAGGCAAAATCCGAGGCCACTGACCGGCTCTCATCCACGGGATGCTACAGCGCTGCCTCAGCTCCTGGTGCATTTTATCAAA 1308  
*X. euvesicatoria* str. 85-10 GACCCCTAACCGCGCGGCACACCCGGGCTTCTACGACTTGAGCAC-----CCCTGCCAGGC-----ATGCGCGCGACGCTACAGCGTGGCGCAATGCTGGTGCATGTGCTCAAG 1287  
*X. perforans* str. 91-118 GACCCCTAACCGCGCGGCACACCCGGGCTTCTACGACTTGAGCAC-----CCCTGCCAGGC-----ATGCGCGCGACGCTACAGCGTGGCGCAATGCTGGTGCATGTGCTCAAG 1287  
*X. alfae* str. GEV-Rose-07 GACCCCTAACCGCGCGGCACACCCGGGCTTCTACGACTTGAGCGC-----CCCTGCCAGGC-----ATGCGCGCGACGCTACAGCGTGGCGCAATGCTGGTGCATGTGCTCAAG 1287  
*X. axonopodis* str. Xac29-1 GACCCCTAACCGCGCGGCACACCCGGGCTTTTACGACTTGAGCAC-----CCCGCCAGGC-----ATACGCGCGACGCTACAGCGTGGCGCAACTGCTGGTGCATGTGCTCAAG 1287  
*X. citri* subsp. *citri* str. jx4 GACCCCTAACCGCGCGGCACACCCGGGCTTTTACGACTTGAGCAC-----CCCGCCAGGC-----ATACGCGCGACGCTACAGCGTGGCGCAACTGCTGGTGCATGTGCTCAAG 1287  
*X. fuscans* subsp. *fuscans* str. 4834-R GACCCCTAACCGCGCGGCACACCCGGGCTTCTACGACTTGAGCAC-----CCCTGCCAGGC-----ATGCGCGCGACGCTACAGCGTGGCGCAACTGCTGGTGCATGTGCTCAAG 1287  
*X. vasicola* str. NCPPB 1060 GACCCCTAACCGCGCGGCACACCCGGGCTTTTACGACTTGAGCAG-----CCCTGCCAGGC-----ATGCGCGCGACGCTTACAGCGTGGCGCAACTGCTGGTGCATGTGCTCAAG 1287  
*X. oryzae* pv. *oryzicola* BLS256 GACCCCTAACCGCGCGGCACACCCGGGCTTTTACGACTTGAGCAG-----CCCGCCAGGC-----ATGCGCGCGACGCTACAGCGTGGCGCAACTGCTGGTGCATGTGCTCAAG 1287  
*X. campestris* str. NCPPB4346 GACCCCTAACCGCGCGGCACACCCGGGCTTTTACGACTTGAGCAG-----CCCGCCAGGC-----ATGCGCGCGACGCTACAGCGTGGCGCAACTGCTGGTGCATGTGCTCAAG 1287  
*X. bromi* isolate LMG947 GATCCCAACCGCGGTGGCACACCAGGCTTTTTCGACGTGAGCAG-----CCCGCCAGGC-----ATACGCGCGACGCTACAGCGTGGCGCAACTGCTGGTGCATGTGCTCAAG 1287  
*Acidovorax avenae* subsp. *avenae* ATCC 19860 GGCCCCGAGGGCGCAGGGCACTGCAGGCTACATGGACATGCACGC-----CGCTCGGGCGGAC---CACCGCAGCGACGTTATGCGGCGGCCAGTTGCTGGTGGCCCTGCTCAAG 1287  
ruler .....1210.....1220.....1230.....1240.....1250.....1260.....1270.....1280.....1290.....1300.....1310.....1320

\* \* \* \* \*  
*X. fragariae* isolate Fap21 CATCCCAGTACCCAGATGGGCTATATCGGGATTTTCAATGAAACGTCGGAGGAGAAATCCCGTTTCATGGAAGCGTTGAAAAAAATCTGCCATTGCAAGCAAAGAGAAGTATCCGC 1410  
*X. gardneri* str. JS749-3 TGCCCCGACTACGACATGGGTTTTTACGGGAATTTTACGGGCAAGACAGAAGAAGATTTCCGTTTCATGGATGCGTTGCAAGCAG---CTATCCTTGAAGACAGGGAAGAGATCGTCCGT 1425  
*X. euvesicatoria* str. 85-10 CGCCCCGACTACAAATGGGCTATGTCGGGATCAATCGCGCCAAGACCGCAGACACCTTCCCTTTCATGGATGCGTTGCAGGCT---CTCCCGGCCGACCACAAGCGCATTTGGTCCGC 1404  
*X. perforans* str. 91-118 CGCCCCGACTACAAATGGGCTATGTCGGGATCAATCGCGCCAAGACCGCAGACACCTTCCCTTTCATGGATGCGTTGCAGGCT---CTCCCGGCCGACCACAAGCGCATTTGGTCCGC 1404  
*X. alfae* str. GEV-Rose-07 CGCCCCGACTACAAATGGGCTATGTCGGGATCAATCGCGCCAAGACCGCAGACACCTTCCCTTTCATGGATGCGTTGCAGGCT---CTCCCGGCCGACCACAAGCGCATTTGGTCCGC 1404  
*X. axonopodis* str. Xac29-1 CGCCCCGACTACAAATGGGCTATGTCGGGATCAATCGCCCCAAGACCGCAGACACCTTCCCTTTCATGGATGCGTTGCAGGCT---CTCCCGGAGACCACAAGCGCATGGTGGTCCGC 1404  
*X. citri* subsp. *citri* str. jx4 CGCCCCGACTACAAATGGGCTATGTCGGGATCAATCGCCCCAAGACCGCAGACACCTTCCCTTTCATGGATGCGTTGCAGGCT---CTCCCGGAGACCACAAGCGCATGGTGGTCCGC 1404  
*X. fuscans* subsp. *fuscans* str. 4834-R CGCCCCGACTACAAATGGGCTATGTCGGGATCAATCGCCCCAAGACCGCAGACACCTTCCCTTTCATGGATGCGTTGCAGGCT---CTCCCGGCCGACCACAAGCGCATGGTGGTCCGC 1404  
*X. vasicola* str. NCPPB 1060 CGCCCCGACTACAAATGGGCTATGTCGGGATCAATCGCCCCAAGACCGCAGACACCTTCCCTTTCATGGATGCGTTGCAGGCT---CTCCCGGAGACCACAAGCGCATGGTGGTCCGC 1404  
*X. oryzae* pv. *oryzicola* BLS256 CGCCCCGACTACAAATGGGCTATGTCGGGATCAATCGCCCCAAGACCGCAGACACCTTCCCTTTCATGGATGCGTTGCAGGCT---CTCCCGGCCGACCACAAGCGCATGGTGGTCCGC 1404  
*X. campestris* str. NCPPB4346 CGCCCCGACTACAAATGGGCTATGTCGGGATCAATCGCCCCAAGACCGCAGACACCTTCCCTTTCATGGATGCGTTGCAGGCT---CTCCCGGCCGACCACAAGCGCATGGTGGTCCGC 1404  
*X. bromi* isolate LMG947 CGCCGCGACTACAAATGGGCTATGTCGGGATCAATCGCCCCAAGACCGCAGACACCTTCCCTTTCATGGATGCGTTGCAGGCT---CTCCCGGCCGACCACAAGCGCATGGTGGTCCGC 1404  
*Acidovorax avenae* subsp. *avenae* ATCC 19860 ACGCCAGCGTACCGTCTTGGCATGGCGGGCATGTCCGGATCGCGGACCGTGGAGGACTTTCCGTTTCGCGCCGGCATTTGAGGGCG---CTCGTGGCCGGCCGGCTGGACCGCGCGGTGGCG 1404  
ruler .....1330.....1340.....1350.....1360.....1370.....1380.....1390.....1400.....1410.....1420.....1430.....1440
