# Supplementary material for: The Xanthomonas euvesicatoria type III effector XopAU is an active protein kinase that manipulates plant MAP kinase signaling
Source: PubMed Central journal article supplement (PMC5805367; doi:10.1371/journal.ppat.1006880), 2018-01-29

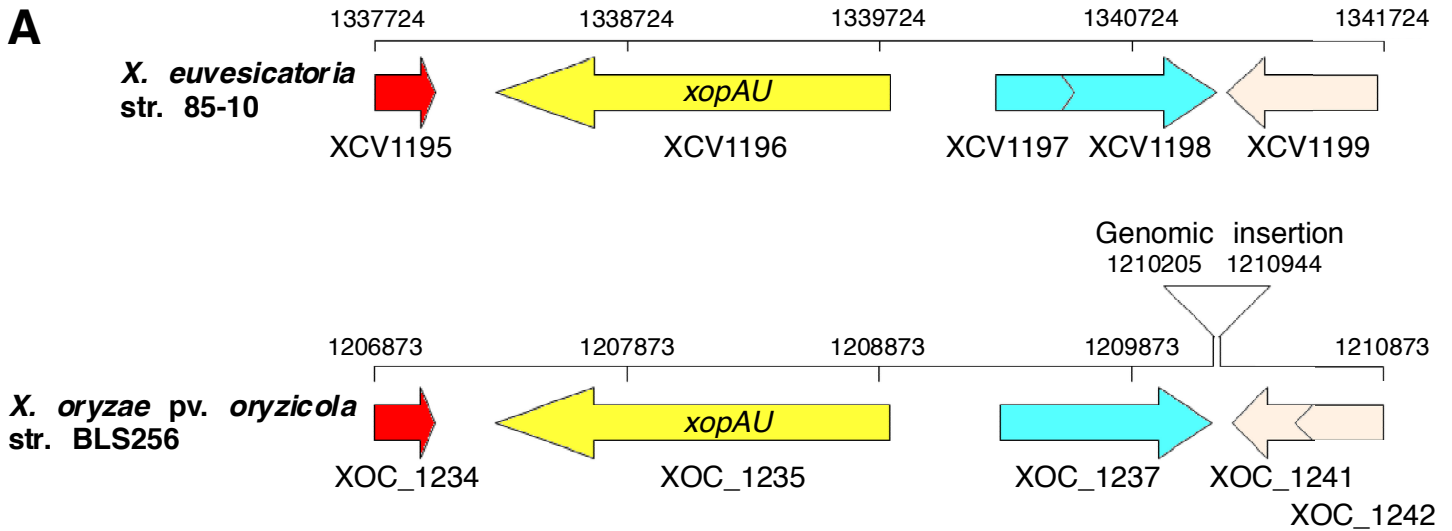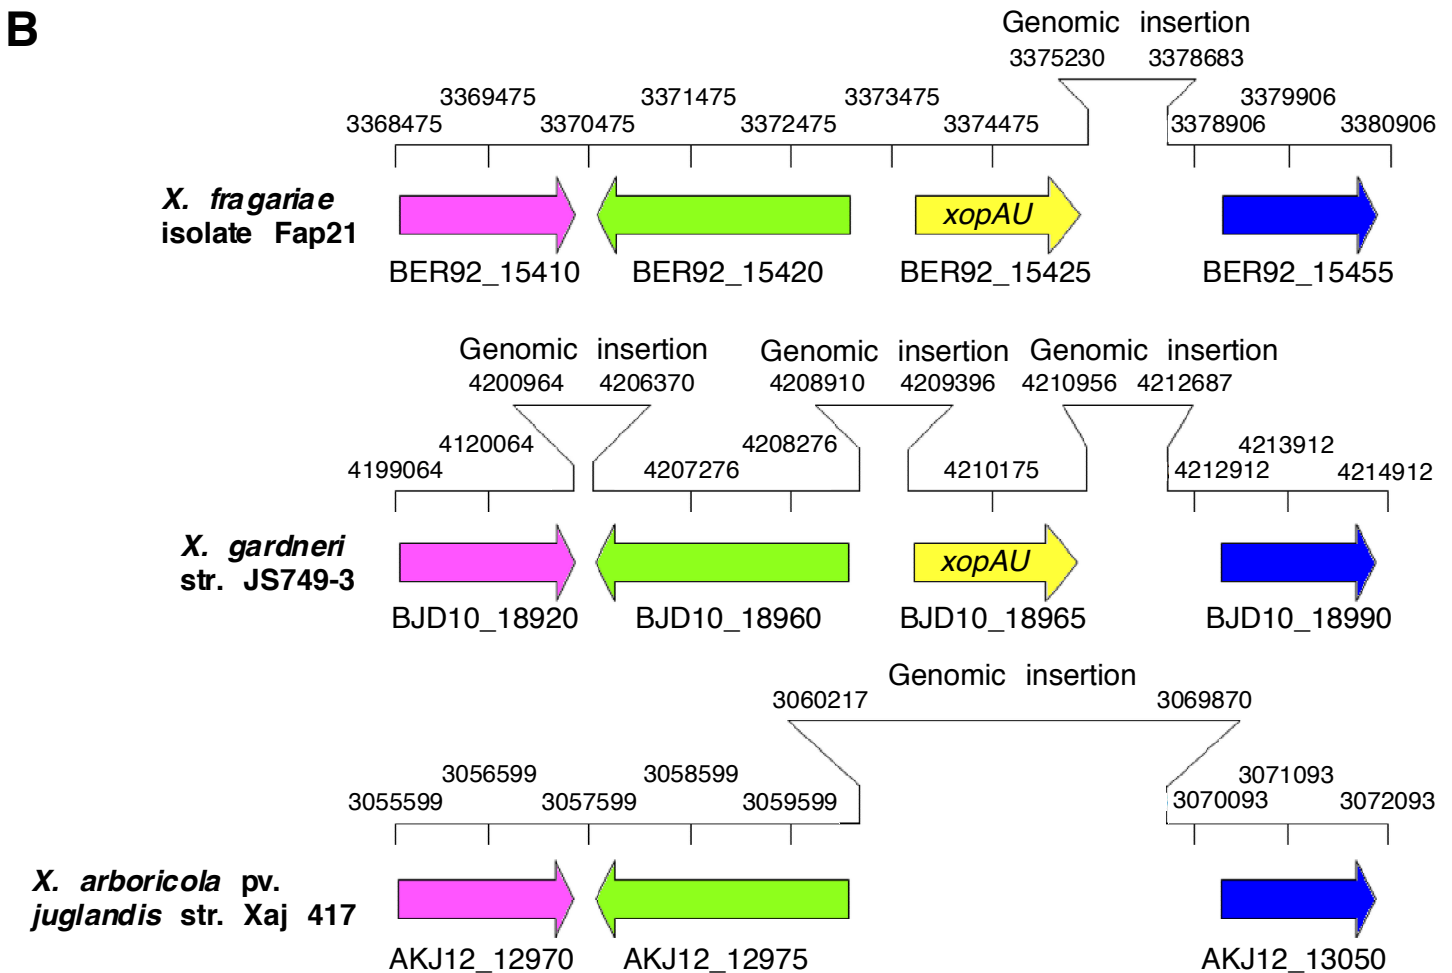

Supplement: ppat.1006880.s006.pdf [file ppat.1006880.s006.pdf]
