# Supplementary material for: The Xanthomonas euvesicatoria type III effector XopAU is an active protein kinase that manipulates plant MAP kinase signaling
Source: PubMed Central journal article supplement (PMC5805367; doi:10.1371/journal.ppat.1006880), 2018-01-29
Supplement: ppat.1006880.s007.pdf [file ppat.1006880.s007.pdf]

|                                                          |                                                     |    |
|----------------------------------------------------------|-----------------------------------------------------|----|
| <i>X. euvesicatoria</i> str. 85-10                       | MKQISGNFTLPSTALRA--DAERDA-PETAQAP--EPHTP-PHPVADHPL  | 44 |
| <i>Acidovorax avenae</i> subsp. <i>avenae</i> ATCC 19860 | ---MAGLPPLSIPSVRPARDGEGTANPEAAPTG--PPRPPGPHAVAHVPL  | 45 |
| <i>X. alfalfae</i> str. GEV-Rose-07                      | MKQISGNFTLPSTALRA--DAERDA-PETAQAP--EPHTP-PHPVADHPL  | 44 |
| <i>X. axonopodis</i> str. Xac29-1                        | MKQISGNFTLPSTALRA--DAERDA-PETAQAP--EQHTP-PHPVADHPL  | 44 |
| <i>X. bromi</i> isolate LMG947                           | MKHISGKPTLLSTAMHA--DAERDE-AETAYSP--EQDTL-LHPVADHPL  | 44 |
| <i>X. campestris</i> str. NCPPB4346                      | MKQISGKFTPPSTALRA--DAERDA-PDTAQAP--EQHPP-PHPVADHPL  | 44 |
| <i>X. citri</i> subsp. <i>citri</i> str. jx4             | MKQISGNFTLPSTALRA--DAERDA-PETAQAP--EQHTP-PHPVADHPL  | 44 |
| <i>X. fragariae</i> isolate Fap21                        | MKKISDTSPAFRIGMQA--EAEQVQ-TSMDRVPP--EHQHV-AEPAQDHPL | 44 |
| <i>X. fuscans</i> subsp. <i>fuscans</i> str. 4834-R      | MKQISGNVTLPLSTALRA--DAERDA-PETAQAP--EQHTP-PHPVADHPL | 44 |
| <i>X. gardneri</i> str. JS749-3                          | MKKISPTSPVIPHGMQA----EGDQ-SETSMHPASEHHEPAATPGQDPLL  | 45 |
| <i>X. oryzae</i> pv. <i>oryzicola</i> BLS256             | MKQISGKFTPPSTALRA--DAKRDA-PDTAQVP--EQHPP-PHPVADHPL  | 44 |
| <i>X. perforans</i> str. 91-118                          | MKQISGNFTLPSTALRA--DAERDA-PETAQAP--EPHTP-PHPVADHPL  | 44 |
| <i>X. vasicola</i> str. NCPPB 1060                       | MKQISGNFTLPSTALRA--DAERDA-PETAQAT--EQHTP-PHPVADHPL  | 44 |
| ruler                                                    | 1.....10.....20.....30.....40.....50                |    |

|                                                          |                                                     |    |
|----------------------------------------------------------|-----------------------------------------------------|----|
| <i>X. euvesicatoria</i> str. 85-10                       | NLLEKRRSITGVLADERKRLEV--VVPRLQAALAP--HTWSSSSSDSPTT  | 90 |
| <i>Acidovorax avenae</i> subsp. <i>avenae</i> ATCC 19860 | LARRRGQSGEGPSAERAPRLAPLDALRRASTFVLPR----SPSSFDHGRR  | 91 |
| <i>X. alfalfae</i> str. GEV-Rose-07                      | NLLEKRRSITGVLADERKRLEV--VVPRLQAALAP--HTWSSSSSDSPTT  | 90 |
| <i>X. axonopodis</i> str. Xac29-1                        | NLLEKRRSTTGMLADERKRLEV--VVPRLQAALAP--HTWSSSSSDSPTT  | 90 |
| <i>X. bromi</i> isolate LMG947                           | NLLEKRRSTTGVLADEHSQLOV--VVPRLQASLAP--QTWSSSSSGSPTT  | 90 |
| <i>X. campestris</i> str. NCPPB4346                      | NLLEKRRTTIGLLADERKRLEV--VVPRLQPSLAP--QTWSSSSSDSPAT  | 90 |
| <i>X. citri</i> subsp. <i>citri</i> str. jx4             | NLLEKRRSTTGMLADERKRLEV--VVPRLQAALAP--HTWSSSSSDSPTT  | 90 |
| <i>X. fragariae</i> isolate Fap21                        | NLLEKRLRKTAESSSEDPSLHI--SVPTISGRLNRFISRSFSSSSSNAPTT | 92 |
| <i>X. fuscans</i> subsp. <i>fuscans</i> str. 4834-R      | NLLEKRRSTTGVLADENTRLEV--VVPRLQAALAP--HTWSSSSSDSPTT  | 90 |
| <i>X. gardneri</i> str. JS749-3                          | NLLEKRRIRSGESSVRELSVDIDRPPPRL---IVPRCLPRSLSSGSTSTT  | 92 |
| <i>X. oryzae</i> pv. <i>oryzicola</i> BLS256             | NLLEKRRTTIGLLADERKRLEV--VVPRLQPCLAP--QTWSSSSSDSPTT  | 90 |
| <i>X. perforans</i> str. 91-118                          | NLLEKRRSITGVLADERKRLEV--VVPRLQAALAP--HTWSSSSSDSPTT  | 90 |
| <i>X. vasicola</i> str. NCPPB 1060                       | NLLEKRRSTTGVLADERTHLEV--VVPRLQAALAP--HTWSSSSSDSPTT  | 90 |
| ruler                                                    | .....60.....70.....80.....90.....100                |    |

|                                                          |                                          |                         |             |     |
|----------------------------------------------------------|------------------------------------------|-------------------------|-------------|-----|
| <i>X. euvesicatoria</i> str. 85-10                       | PVTGR-SPRLGQPQPGSP-TWAC                  | LLETPARLSALAGADSSDAFQNL | LRNARR      | 138 |
| <i>Acidovorax avenae</i> subsp. <i>avenae</i> ATCC 19860 | PGAGRASPSHGAGSSQP                        | PSLASLLDPSTPIARERDGCW   | SPVRALRRERR | 141 |
| <i>X. alfalfae</i> str. GEV-Rose-07                      | PVTGR-SPRLGQPQPGSP-TWAC                  | LLETPARLSALAGADSSDAFQNL | LRNARR      | 138 |
| <i>X. axonopodis</i> str. Xac29-1                        | PVTGR-SPRLGQQPQPGSP-TWAC                 | LLETPARTSALAGADSND      | AFQNLRNARR  | 138 |
| <i>X. bromi</i> isolate LMG947                           | PVTGR-SPRSGARPGSP-ILAS                   | LLETPARASATVGADSSNAFQNL | LRNARR      | 138 |
| <i>X. campestris</i> str. NCPPB4346                      | PLSSR-SPRLGTQPGLP-TWAC                   | LLETPTRTSALAGADSSDAFQNL | LRNARR      | 138 |
| <i>X. citri</i> subsp. <i>citri</i> str. jx4             | PVTGR-SPRLGQQPQPGSP-TWAC                 | LLETPARTSALAGADSND      | AFQNLRNARR  | 138 |
| <i>X. fragariae</i> isolate Fap21                        | PGSGF-SGRPTGYPGFP-TLAS                   | LLDPPTPRSHSPPSGLSHASDI  | LRNERQ      | 140 |
| <i>X. fuscans</i> subsp. <i>fuscans</i> str. 4834-R      | PVTGR-SPRLGQPQPGSP-TWAC                  | LLETPARTSALAGADSND      | AFQNLRNARR  | 138 |
| <i>X. gardneri</i> str. JS749-3                          | PGSDS-SRRSTPYSDLP-VLGS                   | LLDPPTPGSLALTPPPSNAFGI  | LRNERM      | 140 |
| <i>X. oryzae</i> pv. <i>oryzicola</i> BLS256             | PLSSR-SPRLGTQPGLP-TWAC                   | LLETPTRTSALAGTDSSDAFQNL | LRNARQ      | 138 |
| <i>X. perforans</i> str. 91-118                          | PVTGR-SPRLGQPQPGSP-TWAC                  | LLETPARLSALAGADSSDAFQNL | LRNARR      | 138 |
| <i>X. vasicola</i> str. NCPPB 1060                       | SATGR-SPRLSPQPGSP-TWAC                   | LLETPAHTSALAGADSSDAFQNL | LRNARQ      | 138 |
| ruler                                                    | .....110.....120.....130.....140.....150 |                         |             |     |

|                                                          |                                          |                        |           |     |
|----------------------------------------------------------|------------------------------------------|------------------------|-----------|-----|
| <i>X. euvesicatoria</i> str. 85-10                       | LVSDTRHARQHVVLSPRLVKS                    | LTSSERPDLIQKLSALKPGALD | VVDNGFL   | 188 |
| <i>Acidovorax avenae</i> subsp. <i>avenae</i> ATCC 19860 | MQAELRASSGAGVLSPHVVH                     | SMGSP---PGWEARLAALKPG  | AAEVQOGFE | 188 |
| <i>X. alfalfae</i> str. GEV-Rose-07                      | LVSDTRHARQHVVLSPRLVKS                    | LTSSERPDLIQKLSALKPGALD | VVDNGFL   | 188 |
| <i>X. axonopodis</i> str. Xac29-1                        | LVSEMRHARQHVVLSPRLVKS                    | LTSSERPDLIQKLSALKPGALD | VDTGFL    | 188 |
| <i>X. bromi</i> isolate LMG947                           | RVSDMRHARQHVVLSPRLVNS                    | LTSSERPDLILKLSALKPGALD | VDDGGFL   | 188 |
| <i>X. campestris</i> str. NCPPB4346                      | LVSDMRHARQHVMLS PRLVKS                   | LTSSERPDLIQKLSALKPGALD | VDSGFV    | 188 |
| <i>X. citri</i> subsp. <i>citri</i> str. jx4             | LVSEMRHARQHVVLSPRLVKS                    | LTSSERPDLIQKLSALKPGALD | VDTGFL    | 188 |
| <i>X. fragariae</i> isolate Fap21                        | RTRDLRYVQQDVVLS PRTVRS                   | LAAKSQRPEVIERLSTLKPGA  | LEIENGFL  | 190 |
| <i>X. fuscans</i> subsp. <i>fuscans</i> str. 4834-R      | LVSEMRHARQHVVLSPRLVKS                    | LTSSERPDLIQKLSALKPGALD | VDTGFL    | 188 |
| <i>X. gardneri</i> str. JS749-3                          | RMRETRYRRQDVVLS PRTLKDL                  | ASNSPRPELLTKLSLLKPGA   | LEIENGFL  | 190 |
| <i>X. oryzae</i> pv. <i>oryzicola</i> BLS256             | LVSDMRHARQHVVLSPRLVKS                    | LTSSERPDLIQKLSALKPGALD | VDSGFV    | 188 |
| <i>X. perforans</i> str. 91-118                          | LVSDTRHARQHVVLSPRLVKS                    | LTSSERPDLIQKLSALKPGALD | VVDNGFL   | 188 |
| <i>X. vasicola</i> str. NCPPB 1060                       | LVSDMRRARQHVVLSPRLVKS                    | LTSSERPDLIQKLSALKPGASD | VDDGGFL   | 188 |
| ruler                                                    | .....160.....170.....180.....190.....200 |                        |           |     |

|                                                          |                                                     |     |
|----------------------------------------------------------|-----------------------------------------------------|-----|
| <i>X. euvesicatoria</i> str. 85-10                       | HVTLETGHAGTAGTLDAMPTVGTGASASTYAVRLAEDLWQGGQNCGRDFI  | 238 |
| <i>Acidovorax avenae</i> subsp. <i>avenae</i> ATCC 19860 | RVDLDTAWDGPDAAGPAWQRIGGGASGEVYAVRLARNFMQGGEDHGGRDFV | 238 |
| <i>X. alfalfae</i> str. GEV-Rose-07                      | HVTLETGHAGTAGTLDAMPTVGTGASASTYAVRLAEDLWQGEQNCGRDFI  | 238 |
| <i>X. axonopodis</i> str. Xac29-1                        | KVTLETGHAGTAGTLDAMPTVGTGASASTYAVRLAEDLWQGEQHCGRDFI  | 238 |
| <i>X. bromi</i> isolate LMG947                           | QVTLGTRYAGPAETLHTMPTVGI GASASTYAVRLTEDLWQGGENCGRDFI | 238 |
| <i>X. campestris</i> str. NCPPB4346                      | RVTLETGHTGSAGTLDAMPTVGS GASASTYAVRLAEDLWQDGQNCGRAFI | 238 |
| <i>X. citri</i> subsp. <i>citri</i> str. jx4             | KVTLETGHAGTAGTLDAMPTVGTGASASTYAVRLAEDLWQGEQHCGRDFI  | 238 |
| <i>X. fragariae</i> isolate Fap21                        | PVRLERAHSDPRTLQGM RPIGSGASGSAYAVRLAEDFWRAGENCGRDFV  | 240 |
| <i>X. fuscans</i> subsp. <i>fuscans</i> str. 4834-R      | QVTLETGHAGTAGTLHAMPTVGTGASASTYAVRLAEDLWQGGQHCGRDFI  | 238 |
| <i>X. gardneri</i> str. JS749-3                          | PVRLEGTHNGDTQNLKDMQPLGKGASGRAYAVRLAEDFWRGEENCGRDFV  | 240 |
| <i>X. oryzae</i> pv. <i>oryzicola</i> BLS256             | RVTLETGHTGTAGMLDAMPTVGS GASASTYAVRLAEDLWQDGQNCGRAFI | 238 |
| <i>X. perforans</i> str. 91-118                          | HVTLETGHAGTAGTLDAMPTVGTGASASTYAVRLAEDLWQGGQNCGRDFI  | 238 |
| <i>X. vasicola</i> str. NCPPB 1060                       | HVTLETGHAGTAGTLDAMPTVGTGASASTYAVRLAEDLWQGGQNCGRDFI  | 238 |
| ruler                                                    | .....210.....220.....230.....240.....250            |     |

|                                                          |                                                      |     |
|----------------------------------------------------------|------------------------------------------------------|-----|
| <i>X. euvesicatoria</i> str. 85-10                       | FKALLRTDPQRPI PPTLCDPATAADAPALQQRVAERKAMIFQEYQMIRSV  | 288 |
| <i>Acidovorax avenae</i> subsp. <i>avenae</i> ATCC 19860 | FKAMLSLDPEDRLPPRLHAQAP-QDGEGLRQAI AAHTDRIHQEFQVAISL  | 287 |
| <i>X. alfalfae</i> str. GEV-Rose-07                      | FKALLRTDPQRPI PPTLCDPATAADAPALQQRVAERKAMIFQEYQMIRSV  | 288 |
| <i>X. axonopodis</i> str. Xac29-1                        | FKALLCTNPQRPI PLTLYDPATVADAPTLQERIAERRAMIFQEYQMIRSV  | 288 |
| <i>X. bromi</i> isolate LMG947                           | FKALLCTNPQQPI PPTFGGAHTVADAPALQQR IAARKAMIFQEYQILRSV | 288 |
| <i>X. campestris</i> str. NCPPB4346                      | FKALLRTNPQQPAPPTLGDPTCVVDAQALQERIAARKAMIFQEYQMIRSV   | 288 |
| <i>X. citri</i> subsp. <i>citri</i> str. jx4             | FKALLCTNPQRPI PLTLYDPATVADAPTLQERIAERRAMIFQEYQMIRSV  | 288 |
| <i>X. fragariae</i> isolate Fap21                        | FKAMLCPPDPQKPI PCDLYTSH-LQDISNPKEVVSLEKAKIYKEYQMTVSL | 289 |
| <i>X. fuscans</i> subsp. <i>fuscans</i> str. 4834-R      | FKALLCTDPQRPI PPTLCDPATVADAPTLQERIAERKAMIFQEYQMIRSV  | 288 |
| <i>X. gardneri</i> str. JS749-3                          | FKAMLNTDPKNPI PTNLYDKYFQODASDPKDPVSLHEANIYREYQMTVSL  | 290 |
| <i>X. oryzae</i> pv. <i>oryzicola</i> BLS256             | FKALLRTNPQQPAPPTLGHPTCVVDAQALQQR IAARKAMIFQEYQMIRSV  | 288 |
| <i>X. perforans</i> str. 91-118                          | FKALLRTDPQRPI PPTLCDPATAADAPALQQR IAARKAMIFQEYQMIRSV | 288 |
| <i>X. vasicola</i> str. NCPPB 1060                       | FKALLRTDPQPPTPI PGDPTSVADAQALQQHIAARKAMIFQEYQMIRSV   | 288 |
| ruler                                                    | .....260.....270.....280.....290.....300             |     |

## IV

## V

|                                                          |                                                      |     |
|----------------------------------------------------------|------------------------------------------------------|-----|
| <i>X. euvesicatoria</i> str. 85-10                       | DAVPYIVRAHGVVQIEHTFGILLEKIDGISVRSMIGRARTALQOGAISAM   | 338 |
| <i>Acidovorax avenae</i> subsp. <i>avenae</i> ATCC 19860 | RGTSQVMQVRGLVQIGSRLGILSERIDGVPAGELIGEASYALEDGDVAAP   | 337 |
| <i>X. alfalfae</i> str. GEV-Rose-07                      | DAVPYIVRAHGVVQIEHTFGILLEKIDGISVRSMIGRARTALQOGAISAM   | 338 |
| <i>X. axonopodis</i> str. Xac29-1                        | DAVPYIVHAHGVVQIEHTFGILLEKIDGISVRSMIGRARPALQOGAISAM   | 338 |
| <i>X. bromi</i> isolate LMG947                           | DAVPYIVRAHGVVQIEDAFGILLEKIDGISVRSLIGRARAALQQDAITAL   | 338 |
| <i>X. campestris</i> str. NCPPB4346                      | DAVPYIVRAHGVVQIEHTFGILLEKIDGISVRSMIGRARKALQOGAITAM   | 338 |
| <i>X. citri</i> subsp. <i>citri</i> str. jx4             | DAVPYIVHAHGVVQIEHTFGILLEKIDGISVRSMIGRARPALQOGAISAM   | 338 |
| <i>X. fragariae</i> isolate Fap21                        | DAGSRVMRAYGLVQIDNVF GILLEKIKGITVGNFIARAGPALEQGRITAS  | 339 |
| <i>X. fuscans</i> subsp. <i>fuscans</i> str. 4834-R      | DAVPYIVHAHGVVQIEHTFGILLEKIDGISVRSMIGRARTALQOGAISAM   | 338 |
| <i>X. gardneri</i> str. JS749-3                          | DERSRIMRAYGLVQIDDFV GILLEKINGITVGNLIKRRARPALQQGMIAAP | 340 |
| <i>X. oryzae</i> pv. <i>oryzicola</i> BLS256             | DAVPYIVRAHGLVQIEHTFGILLERIDGISVRSMIGRARRALQOGAITAM   | 338 |
| <i>X. perforans</i> str. 91-118                          | DAVPYIVRAHGVVQIEHTFGILLEKIDGISVRSMIGRARTALQOGAISAM   | 338 |
| <i>X. vasicola</i> str. NCPPB 1060                       | DAVPYIVRAHGVVQIEHTFGILLEKIDGISVRSMIARARTALQOGAISAM   | 338 |
| ruler                                                    | .....310.....320.....330.....340.....350             |     |

## VI

## VII

|                                                          |                                                     |     |
|----------------------------------------------------------|-----------------------------------------------------|-----|
| <i>X. euvesicatoria</i> str. 85-10                       | EYLGLARQLMADV LVGIACCEDAGIVHQDISHNNVMYDQPMKIFRLIDMG | 388 |
| <i>Acidovorax avenae</i> subsp. <i>avenae</i> ATCC 19860 | AHMEMARTMIADV LIALARFHDEGVVHQDISHNNVMYDRQRGMFRLIDMG | 387 |
| <i>X. alfalfae</i> str. GEV-Rose-07                      | EYLGLARQLMADV LVGIACCEDAGIVHQDISHNNVMYDQPMKIFRLIDMG | 388 |
| <i>X. axonopodis</i> str. Xac29-1                        | EYLGLARQLMADV LVGIACCEDAGIVHQDISHNNVMYDQPTKIFRLIDMG | 388 |
| <i>X. bromi</i> isolate LMG947                           | DYLGLARQLMADV LVGIACCEDAGIVHQDISHNNVMYDQPMKTFRLIDMG | 388 |
| <i>X. campestris</i> str. NCPPB4346                      | EYLGLARQLMADV LVGIACCEDAGIVHQDISHNNVMYDQPMKIFRLIDMG | 388 |
| <i>X. citri</i> subsp. <i>citri</i> str. jx4             | EYLGLARQLMADV LVGIACCEDAGIVHQDISHNNVMYDQPTKIFRLIDMG | 388 |
| <i>X. fragariae</i> isolate Fap21                        | DYLAVGRQLMADV LIAVSCCEDMGIVHQDISHNNVMYDEPGKMFRLIDMG | 389 |
| <i>X. fuscans</i> subsp. <i>fuscans</i> str. 4834-R      | EYLGLARQLMADV LVGIACCEDAGIVHQDISHNNVMYDQPTRIFRLIDMG | 388 |
| <i>X. gardneri</i> str. JS749-3                          | EYLDVARQLIADV LIALSCCEDMGIVHQDVSHNNVMYDGSKKMFRLIDFG | 390 |
| <i>X. oryzae</i> pv. <i>oryzicola</i> BLS256             | EYLGMARQLMADV LVGIACCEDAGIVHQDISHNNVMYDQPMKIFRLIDMG | 388 |
| <i>X. perforans</i> str. 91-118                          | EYLGLARQLMADV LVGIACCEDAGIVHQDISHNNVMYDQPMKIFRLIDMG | 388 |
| <i>X. vasicola</i> str. NCPPB 1060                       | EYLALARQLMADV LVGIACCEDAGIVHQDISHNNVMYDQPMKIFRLIDMG | 388 |
| ruler                                                    | .....360.....370.....380.....390.....400            |     |

## VIII

## IX

|                                                          |                                          |                       |     |
|----------------------------------------------------------|------------------------------------------|-----------------------|-----|
| <i>X. euvesicatoria</i> str. 85-10                       | LGAEEGDPNRGGTTPGFYDLSTPA--R---           | HARDVYSVAQLLVHVLKRPDY | 433 |
| <i>Acidovorax avenae</i> subsp. <i>avenae</i> ATCC 19860 | QGAEPGGPRAQGTAGYMDMHAARAD---             | HRSADVAAAQLLVRLKTPAY  | 433 |
| <i>X. alfalfae</i> str. GEV-Rose-07                      | LGAEEGDPNRGGTTPGFYDLSAPA--R---           | HARDVYSVAQLLVHVLKRPDY | 433 |
| <i>X. axonopodis</i> str. Xac29-1                        | LGSEEGDPNRGGTTPGFYDLSTPA--R---           | HTRDVYSVAQLLVHVLKRPDY | 433 |
| <i>X. bromi</i> isolate LMG947                           | LGSEEGDPNRGGTTPGFFDVSSPA--R---           | HTRDVYSVAQLLVHVLKRRDY | 433 |
| <i>X. campestris</i> str. NCPPB4346                      | LGAEEGDPNRGGTTPGFYDLSSPA--R---           | HARDVYSVAQLLVHVLKRPDY | 433 |
| <i>X. citri</i> subsp. <i>citri</i> str. jx4             | LGSEEGDPNRGGTTPGFYDLSTPA--R---           | HTRDVYSVAQLLVHVLKRPDY | 433 |
| <i>X. fragariae</i> isolate Fap21                        | LGGEEGEPPRAGTPGYIDMSSPA--S---            | HARDVYSVAQLLVYFLKHPDY | 434 |
| <i>X. fuscans</i> subsp. <i>fuscans</i> str. 4834-R      | LGAEEGDPNRGGTTPGFYDLSTPA--R---           | HARDVYSVAQLLVHVLKRPDY | 433 |
| <i>X. gardneri</i> str. JS749-3                          | LGEEEGEPVRYGTPGFIEANPQATDRLAS            | HPRDVYSAAQLLVHFVKCPTH | 440 |
| <i>X. oryzae</i> pv. <i>oryzicola</i> BLS256             | LGAEEGDPNRGGTTPGFYDLSSPA--R---           | HARDVYSVAQLLVHVLKRPDY | 433 |
| <i>X. perforans</i> str. 91-118                          | LGAEEGDPNRGGTTPGFYDLSTPA--R---           | HARDVYSVAQLLVHVLKRPDY | 433 |
| <i>X. vasicola</i> str. NCPPB 1060                       | LGSEEGDPNRGGTTPGFYDLSSPA--R---           | HARDVYSVAQLLVHVLKRPDY | 433 |
| ruler                                                    | .....410.....420.....430.....440.....450 |                       |     |

## X

## XI

|                                                          |                                                     |     |
|----------------------------------------------------------|-----------------------------------------------------|-----|
| <i>X. euvesicatoria</i> str. 85-10                       | NMGMIGINRAKTADTFPFMDALQA-LPADHKRIVVRRFFNSMLDDGTGERT | 482 |
| <i>Acidovorax avenae</i> subsp. <i>avenae</i> ATCC 19860 | RLGMAGMSGSRVTEDFPFAPALRA-LVPGRLDAVRFINRMIGRQPDARS   | 482 |
| <i>X. alfalfae</i> str. GEV-Rose-07                      | NMGMIGINRAKTADTFPFMDALQA-LPADHKRIVVRRFFNSMLDDGTGERT | 482 |
| <i>X. axonopodis</i> str. Xac29-1                        | NMGMIGINRPKTADTFPFMDALQA-LPADHKRTVVGFFNSMLDDGTGERT  | 482 |
| <i>X. bromi</i> isolate LMG947                           | NMGMIGINRAKTAETFPFMDPLHA-LPADHKRNVRFFNRMLNDGTGKRT   | 482 |
| <i>X. campestris</i> str. NCPPB4346                      | NMGMIGINRAKTADTFPFMEALQA-LPADHKRMVVRFFNSMLDDGTGERT  | 482 |
| <i>X. citri</i> subsp. <i>citri</i> str. jx4             | NMGMIGINRPKTADTFPFMDALQA-LPADHKRTVVGFFNSMLDDGTGERT  | 482 |
| <i>X. fragariae</i> isolate Fap21                        | QMGYIGIFNETSEEKFPFMEALKKNLPFESKREVIRFLNRMISIDANGRA  | 484 |
| <i>X. fuscans</i> subsp. <i>fuscans</i> str. 4834-R      | NMGMIGINRTKTADTFPFMDALQA-LPADHKRTVVHFFNSMLDDGTGERT  | 482 |
| <i>X. gardneri</i> str. JS749-3                          | DMGFTGIFRAKTEEDFPFMDALKQ-LSLKDREEIVRFFNRMITPKENGA   | 489 |
| <i>X. oryzae</i> pv. <i>oryzicola</i> BLS256             | NMGMIGINRAKTADTFPFMEALQA-LPADHKRMVVRFFNSMLDDGTGERT  | 482 |
| <i>X. perforans</i> str. 91-118                          | NMGMIGINRAKTADTFPFMDALQA-LPADHKRIVVRRFFNSMLDDGTGERT | 482 |
| <i>X. vasicola</i> str. NCPPB 1060                       | NMGMIGINRAKTADSFPFMDALQA-LPDDHKCTVVRFFNSMLDDGTGQRT  | 482 |
| ruler                                                    | .....460.....470.....480.....490.....500            |     |

|                                                          |                                       |     |
|----------------------------------------------------------|---------------------------------------|-----|
| <i>X. euvesicatoria</i> str. 85-10                       | KAERLLRDPFFTEPPLPPRDRMHRTYEKL--KRLPSF | 517 |
| <i>Acidovorax avenae</i> subsp. <i>avenae</i> ATCC 19860 | TAEELLGDPFLQE--LEPRALTRATVEKVLNPETPPG | 517 |
| <i>X. alfalfae</i> str. GEV-Rose-07                      | KAERLLRDPFFTEPPLPPRDRMHRTYEKL--KRLPSF | 517 |
| <i>X. axonopodis</i> str. Xac29-1                        | KAERLLRAPFFPEPPLPPRDRMHRTFEKL--TRLPSF | 517 |
| <i>X. bromi</i> isolate LMG947                           | KAEILLRDPFFTETPLPTRDRIHRTYEKL--KRLPSF | 517 |
| <i>X. campestris</i> str. NCPPB4346                      | KAEVLLRDPFFTETPLPPRARMHRTYEKL--KRVPSF | 517 |
| <i>X. citri</i> subsp. <i>citri</i> str. jx4             | KAERLLRAPFFTEPPLPPRDRMHRTFEKL--TRLPSF | 517 |
| <i>X. fragariae</i> isolate Fap21                        | RAEDLLDSFINDPTIPLRNHVHATYKKL--A-----  | 514 |
| <i>X. fuscans</i> subsp. <i>fuscans</i> str. 4834-R      | KAEILLRDPFFTEPPLPPRDRMHRTYEKL--KRLPSF | 517 |
| <i>X. gardneri</i> str. JS749-3                          | TAEDLLKDPFLNAAAIGPRDNVHATLEKLT-----   | 519 |
| <i>X. oryzae</i> pv. <i>oryzicola</i> BLS256             | KAEVLLRAPFFTETPLPPRARMHRTYEKL--KRVPSF | 517 |
| <i>X. perforans</i> str. 91-118                          | KAERLLRDPFFTEPPLPPRDRMHRTYEKL--KRLPSF | 517 |
| <i>X. vasicola</i> str. NCPPB 1060                       | KAETLLRNPFFTQQLPPRDRMHRTYEKL--RRLPSF  | 517 |
| ruler                                                    | .....510.....520.....530.....         |     |
